## 24 **Abstract**

25 We describe a method for measuring genome editing efficiency from *in silico* analysis of  
26 high-resolution melt curve data. The melt curve data derived from amplicons of genome-  
27 edited or unmodified target sites were processed to remove the background fluorescent  
28 signal emanating from free fluorophore and then corrected for temperature-dependent  
29 quenching of fluorescence of double-stranded DNA-bound fluorophore. Corrected data  
30 were normalized and numerically differentiated to obtain the first derivatives of the melt  
31 curves. These were then mathematically modeled as a sum or superposition of minimal  
32 number of Gaussian components. Using Gaussian parameters determined by modeling of  
33 melt curve derivatives of unedited samples, we were able to model melt curve derivatives  
34 from genetically altered target sites where the mutant population could be accommodated  
35 using an additional Gaussian component. From this, the proportion contributed by the  
36 mutant component in the target region amplicon could be accurately determined. Mutant  
37 component computations compared well with the mutant frequency determination from  
38 next generation sequencing data. The results were also consistent with our earlier studies  
39 that used difference curve areas from high-resolution melt curves for determining the  
40 efficiency of genome-editing reagents. The advantage of the described method is that it  
41 does not require calibration curves to estimate proportion of mutants in amplicons of  
42 genome-edited target sites.

## 43 **Introduction**

44 Genome editing at predetermined loci has been greatly facilitated by new technologies  
45 based on RNA-guided endonucleases (RGENs)[1-3] or transcription-activator like effector  
46 nucleases (TALENs) [4-6]. The sequence-directed endonucleases introduce double-  
47 stranded breaks (DSBs) at the target site. The DSBs can undergo two major types of DNA  
48 repair. Non homologous end joining (NHEJ) repair results in indels at the cut site.

49 Homology-directed repair (HDR) either restores the original in the presence of an  
50 endogenous template (sister chromatid) or inserts an exogenous DNA donor template  
51 when available across the cut site [7-9].

52 The ability to generate genome-editing reagents with a desired specificity does not  
53 guarantee efficient target site modification. There is therefore a need for methods that  
54 rapidly assess reagent efficacy. A common approach is to determine efficacy of genome  
55 editing reagents is to transfect human embryonic kidney (HEK293T) cell line with the  
56 reagents. This is followed by amplification of target region by PCR and generation of  
57 heteroduplexes by denaturation and renaturation in the presence of unmodified wild type  
58 or different alleles. Mismatches in these heteroduplexes can be identified by digestion with  
59 single-strand specific endonucleases (such as T7 or Surveyor nuclease) and resolution of  
60 the digestion products in polyacrylamide or agarose gels [10-12].

61 A second approach to determine efficacy of genome editing is to use TaqMan assays with  
62 probes designed to bind over the putative target cut site [12,13]. Reduced binding of the  
63 TaqMan probe, due to indel mutations at the target site, with reference to a control  
64 TaqMan probe that binds outside the cut site, can be used to estimate the editing efficacy.

65 A third method, which is gaining popularity, uses high resolution melting analysis (HRMA)  
66 after real-time PCR with nonspecific double-stranded DNA (dsDNA)-binding dyes such as  
67 Eva Green [12,14-16]. These dyes are more fluorescent when bound to dsDNA. In this  
68 method, after amplifying the target region containing the repaired double-stranded break  
69 site, the dsDNA is gradually warmed until the DNA completely melts. As dsDNA regions  
70 melt into single-stranded regions, dye is expelled, decreasing the fluorescence signal.  
71 Melting characteristics depend on the length of the PCR product, the sequence, and the  
72 GC content. The temperature at which half of the DNA is single-stranded is called the  $T_m$ .  
73 The  $T_m$  peak can be readily identified by first derivative transformations of melt curve

74 data. Target cut sites repaired by NHEJ generally exhibit lower Tms as the amplicons are  
75 usually of smaller size than the wildtype target PCR product. We previously used HRMA to  
76 estimate RGEN editing efficiency [12]. In that study, the region encompassing the target  
77 site was amplified in a real-time PCR buffer and subjected to HRMA. Normalized melt  
78 curves from genome-edited test samples were subtracted from control curves obtained  
79 from unmodified targets to obtain difference curves. The difference curve areas (DCAs)  
80 related directly to the percentage of mutants in the PCR product. We used standard  
81 curves generated with mixes of wild type and mutant PCR products to accurately estimate  
82 the percentage of mutants in different test samples. A major bottleneck to this method was  
83 the requirement for a purely mutant PCR product to generate mixes for calibration curves.  
84 Here we describe an alternative method that does not require standard curves to measure  
85 the proportion of mutant species from high-resolution melt curve data. The high resolution  
86 melt curves were first corrected for temperature dependent quenching of free and ds-DNA  
87 bound fluorophore and then numerically differentiated to obtain first derivative melt curves.  
88 First derivative melt curves from unmodified control target sites were modeled as sum of  
89 two Gaussian components while edited samples were modeled using an additional  
90 Gaussian component for the mutant population discernible in first derivative melt curves.  
91 The weight of the "mutant" Gaussian component was shown to accurately reflect editing  
92 efficiency of sequence-directed endonucleases.

## 93 **Materials & Methods**

### 94 **Cells**

95 Human embryonic kidney (HEK293T) cells were maintained in Dulbecco's modified  
96 Eagle's medium containing 2 mM L-glutamine, 100 U/ml of penicillin, 100 µg/ml  
97 streptomycin and 10% heat-inactivated fetal bovine serum (FBS)  
98 (Hyclone/ThermoFisherScientific, USA) as described previously [17,18].

## 99 **Plasmids**

100 The plasmid constructs encoding TALENs targeting the c-c motif chemokine receptor 5  
101 (CCR5, GenBank RefSeqGene number NG\_012637) intron immediately downstream of  
102 the coding exon have been described [12]. The dimeric guide RNA (dgRNA)-dCas9-FokI  
103 system consists of pSQT1313 and pSQT1601 plasmids. pSQT1313 is used for expression  
104 of dual guide RNAs (gRNAs) that target genomic DNA sequences on opposite strands and  
105 spaced approximately 16 bases apart. pSQT1601 encodes dCas9-FokI fusion protein to  
106 effect DSBs and Csy4 RNase to process the dgRNA expressed by pSQT1313. The  
107 dgRNA-dCas9-FokI system was a gift from Keith Joung via Addgene.org. pSQT1313-  
108 F8S2, targets the human coagulation factor VIII (F8) intron site 2 (F8-S2) and has been  
109 previously described. The targeting/donor plasmid (pDonor-F8) or its backbone construct  
110 (pBackbone) have also been described previously and encode a drug-resistance marker  
111 that allows selecting transfected cells using puromycin.

## 112 **CaPO<sub>4</sub>-mediated transfection**

113 Plasmids were introduced into sub confluent cultures of HEK293T cells in 6-well plates by  
114 CaPO<sub>4</sub> -mediated transient transfection protocol as described previously [18]. Following  
115 transfection, genomic DNA (gDNA) was isolated from unselected or puromycin-selected  
116 populations using Qiagen DNeasy Blood and Tissue kit (Qiagen, Maryland, USA) as per  
117 the recommended protocol.

## 118 **Amplification of target loci for obtaining high-resolution melt curves.**

119 This has been detailed in our earlier study [12]. Briefly, gDNA from genome-edited  
120 samples was amplified using primer pairs SK144 and SK145 for the CCR5 locus, and  
121 SK228 and SK229 for the F8-S2 locus, in Precision Melt buffer (Bio-Rad, USA). SK144  
122 and SK145 generate a PCR product of size 107 bp. For some experiments we used a

123 different forward primer, SK214, that was located further upstream and produced a PCR  
124 product of size 140 bp with reverse primer SK145. The sequences and genome locations  
125 of these primers have been described earlier [12]. The gDNA from unmodified or mock-  
126 transfected cells were also amplified in parallel using the same primer pairs. Post-  
127 amplification melting of the PCR product was done between 65°C to 95°C in 0.2°C  
128 increments.

## 129 **Processing melt curve data**

130 Relative fluorescence units (RFUs) of melt curve data were processed to correct for  
131 background fluorescence of “unbound” fluorophore and for the temperature-dependent  
132 quenching of dsDNA-bound fluorophore as described below.

133 For background fluorescence correction of unprocessed RFU, we used the post-melt  
134 region of individual melt curves identified from plots of the raw RFU vs. temperature. We  
135 plotted this region separately to obtain the parameters of a linear least squares fitting.  
136 From this equation, we were able to extrapolate the background RFU at each of the  
137 measured temperature points (Equation 1). Subtracting this value from the raw RFU gave  
138 us the background subtracted RFU (BcRFU) (Equation 2).

139 The equations for background fluorescence correction of raw RFU:

Extrapolation of post-melt region using a first-order polynomial,

140 
$$B_{pom}(x_i) = a \times x_i + b \quad (1)$$

where,  $x$  = temperature ( $^{\circ}\text{C}$ ) and  $T_{low} \leq x_i \leq T_{high}$

$$i = 1, 2, 3, \dots, \frac{(T_{high} - T_{low})}{0.2}; \quad x_{i+1} - x_i = 0.2 \text{ (temperature increment unit)}$$

$T_{low}$  and  $T_{high}$  refer to the lower (e.g.,  $71^{\circ}\text{C}$ ) and higher (e.g.,  $95^{\circ}\text{C}$ ) limits

of the temperature range selected for melt curve analysis

The slope " $a$ ", and the y-intercept " $b$ " parameters are obtained

from first-order polynomial least-squares fitting of the post-melt region of the melt curve.

141 Background subtracted RFU,  $BcRFU(x_i) = RFU(x_i) - B_{pom}(x_i) \quad (2)$

142 The pre-melt region of a melting curve identified from plots of melt curves of unmodified or  
143 mock-transfected cells was used to determine the efficiency of detecting dsDNA-bound  
144 fluorophore at different temperatures. This region of  $BcRFU(x)$  of mock-transfected cells  
145 was plotted separately and subjected to least squares curve fitting (Equation 3). The  
146 curve-fitting equation was then used to extrapolate the values across the entire range of  
147 temperatures encompassing the melting curve. The resulting values, representing  
148 predicted RFU of unmelted DNA at the different temperatures, were then normalized to the  
149 starting temperature ( $T_{low}$  or  $71^{\circ}\text{C}$ ) to obtain the efficiency of detection of dsDNA-bound  
150 fluorophore at each measured temperature point (Equation 4). The detection efficiency of  
151 dsDNA-bound fluorophore derived from multiple mocks were averaged. The  $BcRFU(x)$  of  
152 mock or test samples were then divided by the average efficiency to obtain unquenched or  
153 fluorescence-corrected RFU ( $FcRFU(x)$ ) at each temperature point (Equation 5). The  
154  $FcRFU(x)$  at  $T_{low}$  ( $71^{\circ}\text{C}$ ) was then used to normalize the melt curve to yield normalized  
155  $FcRFU(x)$  or  $nFcRFU(x)$  (Equation 6). First derivatives of  $nFcRFU$ , obtained by numerical  
156 differentiation (Equation 7), were used for subsequent curve fitting analysis.

157 The mathematical formulations for correction of  $BcRFU(x)$  for temperature-dependent  
158 quenching of fluorescence of dsDNA-bound fluorophore are shown below.

159 Extrapolation of pre-melt region,  $F_{prem}(x_i) = (c \times x_i + d)$  or  $(c \times x_i^2 + d \times x_i + e)$  **(3)**

where, the parameters  $c, d, e$  were obtained from 1<sup>st</sup>-

or 2<sup>nd</sup>-order polynomial least squares fitting

of pre-melt region of  $BcRFU(x)$

160 Efficiency of dsDNA detection at temperature  $x_i$ ,  $E(x_i) = \frac{F_{prem}(x_i)}{F_{prem}(x_i=71^\circ C)}$  **(4)**

161 Fluorescence corrected-RFU,  $FcRFU(x_i) = \frac{BcRFU(x_i)}{E(x_i)}$  **(5)**

162 Normalized FcRFU,  $nFcRFU(x_i) = \frac{FcRFU(x_i)}{FcRFU(x_i=71^\circ C)}$  **(6)**

(where  $nFcRFU(x_i)$  represents dsDNA content ranging from 1 in the pre-melt region  
to 0 in post-melt region)

163 The numerical differentiation of  $nFcRFU(x)$  was carried out as follows:

164  $-\frac{d}{dT}(nFcRFU) \equiv -\frac{d}{dx}((nFcRFU(x_i)) = \frac{-(nFcRFU(x_{i+1})-nFcRFU(x_i))}{x_{i+1}-x_i} = \frac{-(nFcRFU(x_{i+1})-nFcRFU(x_i))}{0.2}$

165 **(7)**

## 166 **Gaussian decomposition of first derivatives melt curves of unedited** 167 **control samples**

168 Gaussian decomposition (GD) of first derivatives of  $nFcRFU(x)$  was done using a  
169 commercial software, CurveExpert Professional (V. 2.6, created by Daniel Hyams,  
170 Madison, AL, USA). The normalized melt curve spans between zero and one and  
171 resembles a cumulative probability distribution function. The first derivative of the  
172 normalized melt curve resembles the density of probability distribution. A normal density  
173 distribution is mathematically represented as:



174 
$$\frac{1}{\sqrt{2\sigma^2\pi}} e^{-\frac{(x-\mu)^2}{2\sigma^2}} \quad (8)$$

175 where,  $\mu$  is the center of the peak,  $\sigma$  is the standard deviation or SD (width at half-maximal  
176 height of peak) and  $x$  is the temperature variable. For simplicity, we refer to this function  
177 hereafter as Gaussian function or Gaussian in place of the more cumbersome "probability  
178 density of normal distribution".

179 Since, the actual Gaussian function is of the form  $ae^{-\frac{(x-\mu)^2}{2\sigma^2}}$ ,  $a$  corresponds to  $\frac{1}{\sqrt{2\sigma^2\pi}}$  in  
180 Equation 8 where the probability density distribution has been integrated and normalized  
181 to one (the area under the curve).

182 For Gaussian modeling of derivative melt curves from unmodified control samples, the first  
183 derivative of nFcRFU from mock-transfected (unmodified loci) samples were modeled as  
184 either a single Gaussian function,  $g_2(x)$ :

185 
$$g_2(x) = w_2 \frac{1}{\sqrt{2\sigma_2^2\pi}} e^{-\frac{(x-\mu_2)^2}{2\sigma_2^2}} \quad (9)$$

where, the free parameter  $w_2$  represents the area under the curve or weight.

186 or as the sum of two Gaussian components,  $g_2(x)$  and  $g_3(x)$ :

187 
$$g_2(x) + g_3(x) = \left( w_2 \frac{1}{\sqrt{2\sigma_2^2\pi}} e^{-\frac{(x-\mu_2)^2}{2\sigma_2^2}} \right) + \left( w_3 \frac{1}{\sqrt{2\sigma_3^2\pi}} e^{-\frac{(x-\mu_3)^2}{2\sigma_3^2}} \right) \quad (10)$$

where, the Gaussian weights,  $w_2 + w_3 = 1$  or  $w_3 = 1 - w_2$ .

188 The parameters  $\mu_2$ , and  $\mu_3$ , refer to the peak center or mean, and  $\sigma_2$  and  $\sigma_3$  refer to the  
189 corresponding standard deviations (SDs) of Gaussian functions  $g_2(x)$  and  $g_3(x)$ ,  
190 respectively. From curve fitting using the sum of two Gaussian functions ( $g_2(x)$  and  $g_3(x)$ ),  
191 we were able to determine and 'fix' the parameters  $w_2$ ,  $w_3$ ,  $\mu_2$ , and  $\mu_3$  for subsequent  
192 determination of percentage of mutants in genome-edited test samples (see below).

## 193 **GD of genome-edited samples**

194 For GD of derivative melt curves from genome-edited samples, the first derivative of  
195  $nFcRFU(x)$  from test samples with genome-edited target loci were curve fitted as a sum of  
196 either two Gaussian functions,  $g1(x)$  and  $g2(x)$  or as the sum of three Gaussian functions,  
197  $g1(x)$ ,  $g2(x)$  and  $g3(x)$ , where  $g1(x)$  represents the contribution of the mutant population,  
198 and  $g2(x)$  and  $g3(x)$  representing the contribution of the wildtype population in the PCR  
199 amplicon of a given target site.

$$200 \quad g1(x) + g2(x) = \left( w_1 \frac{1}{\sqrt{2\sigma_1^2\pi}} e^{-\frac{(x-\mu_1)^2}{2\sigma_1^2}} \right) + \left( (1 - w_1) \frac{1}{\sqrt{2\sigma_2^2\pi}} e^{-\frac{(x-\mu_{2fixed})^2}{2\sigma_2^2}} \right) \quad (11)$$

201 where,  $w_1 + w_2 = 1$ ; the 'fixed' parameter  $\mu_{2fixed}$  was determined from curve fitting of mock  
202 samples using the single-Gaussian function,  $g2(x)$ , the other parameters were set free.

$$203 \quad g1(x) + g2(x) + g3(x) = \left( w_1 \frac{1}{\sqrt{2\sigma_1^2\pi}} e^{-\frac{(x-\mu_1)^2}{2\sigma_1^2}} \right) + \left( w_{2fixed}(1 - w_1) \frac{1}{\sqrt{2\sigma_2^2\pi}} e^{-\frac{(x-\mu_{2fixed})^2}{2\sigma_2^2}} \right) \\ + \left( w_{3fixed}(1 - w_1) \frac{1}{\sqrt{2\sigma_3^2\pi}} e^{-\frac{(x-\mu_{3fixed})^2}{2\sigma_3^2}} \right) \quad (12)$$

204 where,  $w_1 + w_{2fixed}(1-w_1) + w_{3fixed}(1-w_1) = 1$ , and  $w_{2fixed}$ ,  $w_{3fixed}$ ,  $\mu_{2fixed}$ , and  $\mu_{3fixed}$  were  
205 determined from curve fitting of mock samples as the sum of two Gaussian functions,  
206  $g2(x)$  and  $g3(x)$ , the other parameters were set free. The  $w_1$  parameter determined from  
207 curve fitting using either  $g1(x) + g2(x)$  or  $g1(x) + g2(x) + g3(x)$  functions represents the  
208 mutant frequency in the amplicon.

## 209 **Curve fitting model comparison**

210 CurveExpert Professional outputs the corrected Akaike Information Criteria (AICc) values  
211 for comparing curve fitting models - the model with the lower AICc value is deemed to

212 have the better fit. The relative likelihood was calculated using  $e^{-0.5 \times (AIC_{C_{min}} - AIC_{C_i})}$  where  
213  $AIC_{C_{min}}$  is the model with the lower of the two values and  $AIC_{C_i}$  is the value of the alternate  
214 model. CurveExpert Professional also provides fitting "scores" for models, ranging from  
215 zero to 1,000 with a higher score indicating a better fit. The score is in part based on  
216 Akaike information criteria (AICc). The CurveExpert Professional scores were compared  
217 using Student's t-test (paired, two-tailed).

## 218 **Results**

### 219 **High-resolution melt curve analysis**

220 The high-resolution melt curve data used here were generated in an earlier study [12].  
221 Briefly, HEK293T were transfected with genome-editing reagents using a  $CaPO_4$  method.  
222 Two target regions were edited: F8 intron 1, and the CCR5 intron immediately downstream  
223 of the coding exon. Although we targeted three distinct sites within the F8 intron in the  
224 earlier study (referred to as sites F8-S1, -S2 or -S3), here we use data from genome-  
225 edited F8-S2 only. We used TALENs for editing the CCR5 locus and dgRNA/dCas9-FokI  
226 based RGEN system for editing the F8-S2 site. The gDNA, isolated from unselected or  
227 selected populations of transfected cells, were amplified and high-resolution melt curve  
228 data were obtained as described in Materials and Methods.

229 A high-resolution dsDNA melting curve consists of three regions: An initial pre-melt region  
230 where the DNA is double-stranded, followed by a transition to more rapid decrease in  
231 fluorescence attributable to DNA melting (melt region), and a second transition to a post-  
232 melt region where the DNA strands are fully separated. The pre-melt region exhibits a  
233 downward or negative slope with an increase of temperature prior to the transition to  
234 melting. This decrease in fluorescence of dsDNA-bound fluorophore prior to the beginning  
235 of separation of DNA strands can be attributed to temperature-dependent quenching of

236 fluorescence of dsDNA-bound fluorophore. The post-melt region also exhibits a downward  
237 slope, albeit much shallower than the pre-melt slope. Since the post-melt region should  
238 contain only unbound or free fluorophore, the decrease seen in this region can be  
239 attributed to quenching effect of temperature on free or unbound fluorophore. Even after  
240 correcting melt curve data for these two quenching phenomena, the resultant melting  
241 curves of different samples frequently exhibit different pre-melt (starting) RFUs  
242 necessitating a normalization step. The raw fluorescence, reported as relative  
243 fluorescence units or RFU, therefore require processing and normalizing to enable  
244 comparison of different melting curves and for decomposition into their Gaussian  
245 components.

## 246 **Correction of RFU for temperature-dependent quenching of free** 247 **fluorophore**

248 To mathematically approximate free fluorophore behavior in the post-melt region, and to  
249 determine the effect of temperature on fluorescence of free fluorophore over the entire  
250 temperature range of melting, we first plotted the RFU vs. temperature in no template  
251 controls (NTCs) used in the real-time PCR reactions (Fig. 1A). The NTC samples contain  
252 all reactants except for the template gDNA. The RFU of free fluorophore in these reactions  
253 exhibited a temperature-dependent linear decay in fluorescence across the entire  
254 temperature range tested (Fig. 1A). These results validate extrapolating the post-melt  
255 region to estimate background fluorescence from the unbound fluorophore to the earlier  
256 temperature points (see below).

257

258 **Fig. 1** Temperature-dependent quenching of fluorescence of free and dsDNA-bound  
259 fluorophore and its correction. (A) Plot of first-order polynomial curve fit of raw RFU vs.  
260 temperature in no template controls (NTC). The equation shown in the plot is the mean  $\pm$

261 SD of six different sample slopes and constants. (B) The unprocessed high-resolution  
262 melting profile (blue trace) and the extrapolation from first-order polynomial curve fitting of  
263 the post-melt curve region (red dashed line) from an amplicon of an unedited target site.  
264 (C) High-resolution melting profile of background subtracted RFU (BcRFU, blue trace) and  
265 that of 'unquenched' or fluorescence-compensated BcRFU (FcRFU, green trace) from an  
266 unedited target site. The red dashed line shows extrapolation of pre-melt region from first-  
267 order polynomial curve fitting of BcRFU and depicts the predicted BcRFU in the absence  
268 of DNA melting. D) Comparison of first-order polynomial curve fitting of post-melt and pre-  
269 melt portions of melting curves. Normalized data were used to enable plotting of the two  
270 sets of data.

271

272 For correction of background fluorescence for each melt curve, we carried out first-order  
273 polynomial curve fitting of the post-melt region of each melt curve data and then  
274 extrapolated the background RFU values for earlier temperature data points (red dashed  
275 line in Fig. 1B). We then subtracted the background RFUs corresponding to each  
276 temperature point to obtain the background subtracted RFU or BcRFU as described in  
277 Materials and Methods (Equation 2). The  $BcRFU(x)$  melt curve is shown in Fig. 1C (blue  
278 trace). The post-melt region of background subtracted-curve was nearly horizontal with an  
279 RFU close to zero indicating that the background fluorescence from free or unbound  
280 fluorophore was correctly computed and removed by this method.

## 281 **Correction of RFU for temperature-dependent quenching of dsDNA-** 282 **bound fluorophore**

283 To correct for quenching of fluorescence of dsDNA-bound fluorophore of background  
284 subtracted melt curve data ( $BcRFU(x)$ ), we carried out a regression analysis of the pre-  
285 melt region of mock-transfected samples and extrapolated the RFUs across the range of

286 temperatures (red dashed line in Fig. 1C) (Equation 3). We obtained the efficiency of  
287 detection of dsDNA-bound fluorophore by normalizing  $F_{\text{prem}}(x)$  to the estimated RFU at the  
288 starting temperature ( $T_{\text{low}}$  or 71°C) (Equation 4). The efficiency at each measured  
289 temperature was then determined for multiple mock samples (Fig. 1D). Measured  
290 efficiencies were nearly identical, diverging slightly at the higher temperatures, despite  
291 determination across experiments conducted on different days, and with different samples.  
292 The BcRFU of mock and test samples were divided by the average fluorescence efficiency  
293 at each measured temperature to obtain fluorescence corrected  $BcRFU(x)$  or  $FcRFU(x)$  (  
294 Fig. 1C, green tracing) (Equation 5). The pre-melt region was now rendered horizontal and  
295 did not exhibit the temperature-dependent quenching profile of uncorrected melting  
296 curves. For the F8-S2 target amplicon melt curve fitting with a first order polynomial  
297 proved sufficient; for the CCR5 target amplicon melt curve, a second-order polynomial was  
298 required (see below).

299 We next wished to directly compare the temperature-dependent quenching effect on  
300 bound fluorophore vs. free fluorophore. To enable this comparison, we normalized the  
301 extrapolated background RFUs (determined from individual post-melt curve data of  
302 mocks) and plotted these along with the normalized bound-fluorophore efficiency (Fig.  
303 1D). As anticipated from the NTC data shown in Fig. 1A, the slope of the free fluorophore  
304 (-0.002) was much more shallow than that of the bound fluorophore (-0.04). Thus,  
305 temperature-dependent fluorescence quenching of dsDNA-bound fluorophore is more  
306 pronounced and significant than that of the unbound or free fluorophore.

### 307 **Rationale for Gaussian modeling of first derivate melt curves**

308 After high-resolution melt curve data were corrected for temperature-dependent quenching  
309 of unbound and dsDNA-bound fluorophore, curves were normalized and then numerically  
310 differentiated (Materials and Methods, Equations 6 and 7, respectively). When plotted, the

311 processed data showed that both the pre-melt and post-melt regions were squarely placed  
312 on the zero baseline as expected (Fig. 2). The resulting peak of the first-derivate melt  
313 curve data resembled a “bell” curve. Bell-shaped density distribution curves can result  
314 from Cauchy-Lorentz, Student’s-t, Logistic or Gaussian distributions [19]. The Cauchy-  
315 Lorentz density distribution has longer tails, while the Student’s-t and Logistic density  
316 distributions exhibit heavier tails (kurtosis). The Gaussian distribution therefore seemed  
317 more suitable for empirical modeling of first-derivative melt curves. A preliminary curve  
318 fitting analysis using the Cauchy-Lorentz distribution function showed lower fit scores than  
319 the Gaussian distribution function.

320

321 **Fig. 2** GD of first derivative of high-resolution melt curves of amplicons from gDNA of  
322 unmodified target sites. gDNA from mock-transfected HEK293T cells (Mocks) were PCR  
323 amplified using primer pairs targeting F8-S2 or CCR5 loci to obtain high resolution melt  
324 curve data as described in Materials and Methods. The normalized and fluorescence  
325 corrected melt curve data (nFcrFU) from F8-S2 (A and C) and CCR5 (B and D) target  
326 sites were numerically differentiated as described in Materials and Methods (Equation 7).  
327 1-GD (A and B) and 2-GD curve fitting of derivative melt curves were done using  
328 CurveExpert Professional using Equation 9 and Equation 10, respectively. The first  
329 derivative (y-axis:  $-d(nFcrFU)/dT$ ) was plotted against temperature (x-axis) and is shown  
330 as blue dots. The 1-GD curve fit to the first derivative data is shown as a red trace in A and  
331 B. The individual Gaussians of 2-GD curve fit are shown as brown ( $g_2(x)$ ) or green dashed  
332 lines and their sum ( $g_2(x) + g_3(x)$ ) is depicted as a solid red line in C and D. Table E  
333 shows the Gaussian parameters determined from 1-GD curve fitting of A and B, while  
334 Table F shows the parameters identified by 2-GD curve fitting of C and D using the  
335 CurveExpert Professional software.

336 **Two-Gaussian decomposition is superior to one-Gaussian modeling of**  
337 **derivative melt curves of unmodified target sites**

338 We first determined the parameters of the Gaussian components of first derivatives of  
339  $nFcRFU(x)$  of unmodified or control samples (mocks) by curve fitting using the commercial  
340 software CurveExpert Professional (Materials and Methods). Gaussian curve fitting  
341 requires the user to input initial guesses for three of the parameters of a Gaussian  
342 function: curve weight ( $w$ ), curve center ( $\mu$ ), and width at half-maximal height ( $\sigma$ ) or  
343 standard deviation (SD). After multiple converging iterations using systematic changes to  
344 the parameters of the model, the software finds parameters with the fitting accuracy  
345 required or the maximum number of iterations is reached. The curve fitting output consists  
346 of the curve-fitted weight (' $w$ ' or area under the curve), curve center ( $\mu$ ) and the SD ( $\sigma$ ).  
347 The better the curve fit, the closer the weight or area under the curve approaches 1 for  
348 derivatives of normalized melt curves.

349 We wished to use the simplest possible mathematical model for measuring the proportion  
350 of mutant population in the amplicon of the target region. This would consist of one  
351 Gaussian component for describing first derivative of  $nFcRFU$  of unmodified mocks and  
352 another Gaussian for the mutant population. The first derivative melting curves ( $-$   
353  $d(nFcRFU(x))/dx$ ) from unmodified F8-S2 and CCR5 loci (Fig. 2A and 2B) were curve fitted  
354 using a single-Gaussian function,  $g_2(x)$  (Materials and Methods, Equation 9). We refer to  
355 this as single-Gaussian decomposition (1-GD). Modeling the first derivative of the F8-S2  
356 target site showed the area under the curve had a weight ( $w_2$ ) of  $0.9537 \pm 0.0021$ . The  
357 deviation of the fitted curve from the actual melt curve was clearly visible over the pre-melt  
358 to melt transition region where the  $T_m$  of the amplicons with deletion mutations is situated  
359 (Fig. 2A). 1-GD curve fitting for the CCR5 target was similar to that of F8-S2 target but with  
360 only a slight divergence from the actual derivative melt curve (Fig. 2B). Consistent with this



361 the area under the curve was  $1.003 \pm 0.0039$  (from four independent replicates). As in the  
362 case of the F8-S2 target site, we saw a small divergence in the early melting region Fig.  
363 2B ( $g_2(x)$  vs.  $-d(nFcRFU)/dT$ ).

364 Since the mutant molecules contribute to the melt profile in the early melt region, it was  
365 necessary to ensure a more accurate curve fitting over this region than provided by a  
366 single Gaussian component. To this end, we tested modeling of derivative melt curves of  
367 unmodified controls as a sum of two Gaussian functions,  $g_2(x) + g_3(x)$ , (Materials and  
368 Methods, Equation 10). As for the 1-GD curve fitting, we provided initial best guesses for  
369 the five parameters (three for first Gaussian component and two for the second Gaussian  
370 component). For the  $g_3(x)$  Gaussian we suggested initial guesses for the mean ( $\mu_3$ ) over  
371 the pre-melt/melt transition region. We stipulated that the sum of weights for  $w_2$  and  $w_3$   
372 should equal one and set free  $w_2$  (and thereby,  $w_3 = 1 - w_2$ ). The results of this curve fitting  
373 experiment are shown in Fig. 2C and 2D for the F8 and CCR5 loci, respectively. Unlike 1-  
374 GD curve fitting, the sum of two Gaussian curve fitting (Fig. 2,  $g_2(x) + g_3(x)$  indicated by a  
375 red trace vs.  $-d(nFcRFU)/dT$  indicated by blue dots) recreated the derivative melt curve  
376 nearly perfectly. When we compared CurveExpert Professional scores (see Materials and  
377 Methods, Comparing two curve fitting models), the two-Gaussian decomposition (2-GD)  
378 model outscored the 1-GD model for both F8 and CCR5 mock samples (Table 1). This  
379 difference, although slight, was statistically significant (paired Student's-t test,  $p = 0.0000$ ).  
380 The AICc values were lower for the 2-GD model indicating that it had a better fit. The  
381 relative likelihood calculations from the AICc values of both 1- and 2-GD models, also  
382 showed that 2-GD model was better (Table 1).

383

384 Table 1 2-GD model shows better fit than 1-GD for derivative melt curve data of mocks

| Targeting<br>Plasmid | Selection | Sample       | 1-GD<br>score | 2-GD score | 1-GD AICc | 2-GD AICc | $\Delta$ AICc | Relative<br>likelihood |
|----------------------|-----------|--------------|---------------|------------|-----------|-----------|---------------|------------------------|
| pBackbone            | No        | F8-S2 Mock 1 | 981           | 995        | -625      | -785      | 160           | 0.0000                 |
| pBackbone            | No        | F8-S2 Mock 2 | 982           | 995        | -629      | -795      | 166           | 0.0000                 |
| pDonor               | No        | F8-S2 Mock1  | 980           | 995        | -620      | -786      | 166           | 0.0000                 |
| pDonor               | No        | F8-S2 Mock 2 | 980           | 996        | -618      | -812      | 194           | 0.0000                 |
| pBackbone            | Yes       | F8-S2 Mock 1 | 978           | 996        | -615      | -813      | 198           | 0.0000                 |
| pBackbone            | Yes       | F8-S2 Mock 2 | 979           | 996        | -618      | -803      | 185           | 0.0000                 |
| pDonor               | Yes       | F8-S2 Mock 1 | 981           | 995        | -629      | -791      | 161           | 0.0000                 |
| pDonor               | Yes       | F8-S2 Mock 2 | 981           | 996        | -625      | -806      | 181           | 0.0000                 |
| None                 | No        | CCR5 Mock 1  | 984           | 997        | -732      | -979      | 247           | 0.0000                 |
| None                 | No        | CCR5 Mock 2  | 985           | 998        | -748      | -969      | 221           | 0.0000                 |
| None                 | No        | CCR5 Mock 3  | 984           | 998        | -729      | -1057     | 328           | 0.0000                 |

|      |    |             |     |     |      |      |     |        |
|------|----|-------------|-----|-----|------|------|-----|--------|
| None | No | CCR5 Mock 4 | 983 | 997 | -721 | -990 | 268 | 0.0000 |
|------|----|-------------|-----|-----|------|------|-----|--------|

---

385

386 First-derivative melt curves from unmodified F8-S2 and CCR5 target sites provided distinct  
387 Gaussian parameters from curve fitting as expected from their differing amplicon sizes,  
388 sequences and differing Tms. Thus, they exhibited distinct centers or means for both 1-GD  
389 ( $\mu_2$  of  $79.19 \pm 0.002$  vs.  $82.753 \pm 0.087$ ) (Table E in Fig. 2) and 2-GD fitting ( $\mu_2$  of  $79.31 \pm$   
390  $0.017$  vs.  $82.898 \pm 0.088$  and  $\mu_3$  of  $78.642 \pm 0.013$  vs.  $82.265 \pm 0.069$  for F8-S2 and  
391 CCR5, respectively) (Table F in Fig. 2). Likewise, they showed distinct differences in the  
392 contribution of weights:  $w_2$  of  $0.954 \pm 0.002$  vs.  $1.003 \pm 0.004$  in 1-GD fitting; and  $w_2$  of  
393  $0.647 \pm 0.006$  vs.  $0.587 \pm 0.009$  for F8-S2 and CCR5, respectively in 2-GD fitting. These  
394 results highlight the requirement for determining Gaussian parameter values for each  
395 target site from amplicons obtained from corresponding control or unmodified samples.

### 396 **Estimating percentage of mutants by GD of derivative melt curves from** 397 **genome-edited samples**

398 Comparing derivative melt curves of unmodified and genome-edited samples shows a  
399 distinct mutant molecules' peak with a lower melting temperature (Fig. 2 vs. Fig. 3). *We*  
400 *hypothesized that upon decomposition of the melting profile into its Gaussian components,*  
401 *the area under the mutant peak would correspond to the proportion of mutant molecules in*  
402 *the PCR product.* The Gaussian function representing the mutant population was  
403 designated  $g_1(x)$  in Equations 11 and 12 (Materials and Methods).

404

405 **Fig. 3** 3-GD of first derivative of high-resolution melt curves for estimation of mutant  
406 percentage in genome-edited samples. gDNA was isolated from HEK293T cells  
407 transfected with F8-S2 targeting RGENs or CCR5 targeting TALENs and PCR amplified  
408 using corresponding primer pairs to obtain high resolution melt curve data (Materials and  
409 Methods). 3-GD curve fitting was done on first derivative melt curves using CurveExpert  
410 Professional and Equation 12 as described in Materials and Methods. The individual

411 Gaussians- $g_1(x)$  (purple dashed line),  $g_2(x)$  (brown dashed line) and  $g_3(x)$  (green dashed  
412 line) and their sum-  $g_1(x) + g_2(x) + g_3(x)$  (red solid line) were overlaid over the first  
413 derivative melt curve (blue dots). GD of F8-S2 is shown in A and of CCR5 in B. Table C  
414 shows the parameters (weights, centers and SDs) of 3-GD. The parameters that were  
415 fixed from GD of mocks and those that were set free during 3-GD of edited samples are  
416 shown in the Comments column. The  $g_1$  weight ( $w_1$ ) represents the mutation frequencies  
417 in the amplicons of genome-edited F8-S2 and CCR5 target sites, respectively.

418

419 Since the better curve fitting of unmodified controls was obtained by using sum of two  
420 Gaussian functions, we modeled derivative melt curves of test samples as a sum of three  
421 Gaussian functions,  $g_1(x) + g_2(x) + g_3(x)$  (Materials and Methods, Equation 12). The  
422 parameters obtained from 2-GD of derivative melt curves of unmodified controls from F8-  
423 S2 and CCR5 (means and weights) were then used to decompose corresponding test or  
424 genome-edited samples. The different Gaussian components,  $g_1(x)$ ,  $g_2(x)$  and  $g_3(x)$ , and  
425 their sum  $g_1(x) + g_2(x) + g_3(x)$  are shown in Fig. 3. The predicted curve of the sum of the  
426 three Gaussians was a near-perfect fit to the original derivative melt curve from test  
427 samples (Fig. 3,  $g_1(x) + g_2(x) + g_3(x)$ , indicated by a red tracing vs.  $-d(nFcRFU)/dT$  (Fig.  
428 3, blue dots). The area under the  $g_1$  curve,  $w_1$ , of three-Gaussian decomposition (3-GD)  
429 was deemed to represent the mutant population. The percentage of mutant population  
430 estimated in amplicons of genome-edited F8-S2 and CCR5 target sites by 3-GD, shown in  
431 Table C in Fig. 3, was  $18.6 \pm 3.2\%$  vs.  $23.2 \pm 8.7\%$ , respectively. These results  
432 demonstrate that first derivative melt curves from genetically altered sites can be modeled  
433 successfully as a sum of three Gaussian functions.

434 Since the 1-GD of unedited samples was below the data points in the pre-melt to melt  
435 transition region (Fig. 2), we hypothesized that 2-GD of genome-edited samples would

436 over estimate the mutant frequency. The results of these comparisons are shown in Fig. 4.  
437 2-GD modeling estimated significantly higher mutant frequency than 3-GD modeling of  
438 edited samples (Fig. 4A and 4B) as predicted.

439

440 **Fig. 4** Comparison of mutant percentage estimation by 2- and 3-GD. First derivatives of  
441 high-resolution melt curves from genome-edited samples were curve fitted using 2- or 3-  
442 GD models as described in Materials and Methods (Equation 11 and Equation 12,  
443 respectively). The mutant percentages estimated from curve fitting are shown along the y-  
444 axis for F8-S2 (A) and CCR5 (B). Two molecular clones (10 and 11) of dgRNAs targeting  
445 F8-S2 site and two pairs of TALENs (L1R1 and L2R2) targeting CCR5 site were tested.  
446 The mutant percentages were compared using Student's t-test (two-tailed). The p-values  
447 of the pair-wise comparisons of 2-GD and 3-GD are shown above the bars.

448

449 Better curve fitting of 3-GD over 2-GD modeling was also revealed by the CurveExpert  
450 Professional scores (Table 2). These differences were statistically significant (paired  
451 Student's t-test,  $p = 0.00001$ ). The AICc values were lower, indicating a better fit, for the 3-  
452 GD model. Relative likelihood determinations from AICc values also revealed that the 3-  
453 GD model was better. These results demonstrated that the 3-GD modeling was the  
454 appropriate choice for GD of first derivative melt curves of amplicons of genome-edited  
455 target sites.

456

457 **Table 2** 3-GD model achieves better fit than 2-GD for derivative melt curve data of genome-edited samples

| F8-S2 site    |               |              |              |               |                        | CCR5 site     |               |              |              |               |                        |
|---------------|---------------|--------------|--------------|---------------|------------------------|---------------|---------------|--------------|--------------|---------------|------------------------|
| 2-GD<br>Score | 3-GD<br>Score | 2-GD<br>AICc | 3-GD<br>AICc | $\Delta$ AICc | Relative<br>likelihood | 2-GD<br>Score | 3-GD<br>Score | 2-GD<br>AICc | 3-GD<br>AICc | $\Delta$ AICc | Relative<br>likelihood |
| 979           | 992           | -780         | -911         | 131           | 0.0000                 | 990           | 997           | -837         | -988         | 151           | 0.0000                 |
| 990           | 996           | -879         | -1005        | 126           | 0.0000                 | 985           | 995           | -776         | -907         | 130           | 0.0000                 |
| 992           | 996           | -923         | -1008        | 85            | 0.0000                 | 978           | 993           | -733         | -870         | 137           | 0.0000                 |
| 983           | 994           | -797         | -949         | 153           | 0.0000                 | 968           | 990           | -690         | -830         | 140           | 0.0000                 |
| 990           | 995           | -871         | -978         | 108           | 0.0000                 | 978           | 993           | -728         | -871         | 143           | 0.0000                 |
| 992           | 996           | -888         | -1000        | 112           | 0.0000                 | 973           | 992           | -704         | -857         | 154           | 0.0000                 |
| 991           | 996           | -869         | -980         | 111           | 0.0000                 | 972           | 992           | -703         | -851         | 148           | 0.0000                 |
| ND            | ND            |              |              | ND            | ND                     | 968           | 991           | -681         | -834         | 152           | 0.0000                 |

458

459

## 460 **Comparison of GD method to prior approaches for measuring efficiency** 461 **of genome editing**

462 We next carried out 3-GD of high resolution melt curves of samples previously  
463 characterized by NGS and by an alternative approach to measure mutant population  
464 based on difference curve areas (DCAs) of normalized high-resolution melt curve profiles.  
465 These samples exhibited a wide range of mutant percentages that were influenced by  
466 puromycin drug selection and the use a donor template containing plasmid (pDonor-F8) or  
467 its corresponding control plasmid (pBackbone) [12]. There were four categories of  
468 samples: (1) pBackbone/Unselected, (2) pDonor/Unselected, (3) pBackbone/Selected,  
469 and (4) pDonor/Selected. These four categories showed progressively increasing  
470 percentages of mutations in the earlier study [12]. Two different clones of RGENs targeting  
471 the F8-S2 site, clone 10 and clone 11, were tested. Clone 10 had previously exhibited  
472 higher efficiencies than clone 11.

473 Results of curve fitting of derivative melt curves of mocks using 2-GD and of genome-  
474 edited samples by 3-GD are shown for all the replicate samples in Fig. 5A. In all instances,  
475 GD was able to accurately model the derivative melt curves including the mutant molecules'  
476 peak. The area under this peak,  $w_1$ , is shown as percentage within the plots. RGEN F8-S2  
477 clone 10 edited samples showed higher percentages of mutants than clone 11. Drug-  
478 selected samples exhibited higher mutant frequencies than corresponding unselected  
479 samples and samples that received pDonor-F8 template (to effect homologous  
480 recombination) exhibited higher mutant frequencies than corresponding samples that  
481 received the control pBackbone plasmid.

482

483 **Fig. 5** Mutant frequency determination by 3-GD and comparison to difference curve areas  
484 (DCAs) and next generation sequencing (NGS) data. HEK293T cells were transfected with



485 F8-S2 targeting dgDNA clone 10 (F8-S2 Cl.10) or clone 11 (F8-S2 Cl.11) together with a  
486 dCas9-FokI construct. The cells were also cotransfected with either pBackbone or pDonor-  
487 F8 targeting plasmids (Materials and Methods). Following transfection, gDNAs were  
488 isolated from unselected cells or cells selected with puromycin and used for amplification  
489 by PCR using appropriate primer pairs targeting F8-S2 loci to obtain high-resolution melt  
490 curve data. (A) Mutant percentage estimations by 3-GD for the four different categories of  
491 samples from unedited and edited F8-S2 site are identified on the left. The derivative melt  
492 curves are shown as blue dots and the fitted curves from GD as red traces. Four PCR  
493 replicates were analyzed for each clone with one exception (F8-S2 clone 10,  
494 pBackbone/Unselected) for which only three replicates were tested. The mutant frequency  
495 (percentage) estimated from the area of the mutant peak ( $w_1$  parameter from  $g_1(x)$ ), of 3-  
496 GD) for each replicate is shown within the plot. (B-D) The average mutant frequency  
497 determined by GD for the different categories in A were compared to mutant frequencies  
498 determined by difference curve areas (DCA) (C) and to mutant frequency determination  
499 from next generation sequencing (NGS). NGS was only done on unselected samples. (E)  
500 Mutant frequency estimation from GD of high resolution melt curve data from gDNA of  
501 HEK293T cells transfected with TALENs (two independent pairs of molecular clones  
502 L1R1, L2R2) targeting CCR5 locus. CCR5 edited samples were also analyzed by NGS.  
503 Error bar = 1 SD.

504

505 Direct comparison of the results with mutant frequency determination using DCA is shown  
506 in Fig. 5B-C. Consistent with our previous observations, the percentage of mutants  
507 estimated by both methods were within 3% of each other for both selected and unselected  
508 samples (pBackbone or pDonor). There were two exceptions where the differences were  
509 4.6% and 11.3%, respectively, with GD providing lower estimates. Possible explanations  
510 for this discrepancy are provided in Discussion. The NGS of unselected samples treated

511 with pBackbone showed a similar trend as the above two methods (Fig. 5D) with clone 10  
512 again showing higher efficiency of target site modification than clone 11. NGS generally  
513 provided higher estimations of mutant frequencies than GD or DCA methods due to the  
514 inclusion of insertion mutations in the calculations.

515 We used GD to also estimate the proportion of mutants in amplicons of samples edited at  
516 the CCR5 locus. Here too, the results of GD and NGS showed similar trends (Fig. 5D).  
517 These results *in toto* demonstrate that curve fitting of first derivative of high-resolution melt  
518 curves is comparable to other methods used previously for estimating the proportion of  
519 mutants in amplicons of genome-edited target sites. The results also indicate that one  
520 could estimate mutant frequency percentages by GD for target sites for which there is no  
521 ready availability of a 100% mutant population to generate calibration curves for the DCA  
522 method (in this case genome-edited CCR5 target site).

523 **The size of the PCR product does not affect estimation of percentage of**  
524 **mutants by GD from the same target locus despite exhibiting distinct**  
525 **Gaussian parameters.**

526 We next wished to test if the size of the amplicon affected the estimation of percentage of  
527 mutants. To this end, we amplified unmodified or genome-edited CCR5 target sites using  
528 two sets of primers. The same antisense primer (SK145) was used for both PCR  
529 amplifications but one of the sense primers (SK214) was situated further upstream of  
530 primer SK144 so that the resulting amplicon sizes were 140 and 107 bp, respectively. GD  
531 of high-resolution melt curves of both sizes of amplicons was done as above. Results are  
532 shown in Fig. 6. The larger amplicon exhibited higher means ( $\mu_1$ ,  $\mu_2$  and  $\mu_3$ ) for the three  
533 Gaussian functions than the smaller one, as expected, and also showed distinguishable  
534 SDs (Table 3). The percentages of mutants estimated from the larger or smaller PCR  
535 product sizes determined by GD were  $29.8 \pm 1.1$  % vs.  $28.9 \pm 8.6$  %, respectively. The

536 values were not statistically significant (Student's t-test,  $p \geq 0.05$ ). These results suggest  
537 that small differences in amplicon sizes (less than 50 bp) do not affect the estimation of  
538 genome-editing efficiency by GD.

539

540 **Fig. 6** Size of PCR product does not affect determination of mutant percentage by GD.

541 The CCR5 target site in gDNA of unmodified or genome-edited cells were amplified using  
542 two pairs of primers designed to produce two distinct sizes of product (107 bp and 140 bp,  
543 respectively). The amplicons were subjected to high-resolution melting and then  
544 processed to correct for temperature-dependent quenching of fluorescence of free and  
545 dsDNA-bound fluorophore. The resulting melt curves of genome-edited (for clone pair  
546 L1R1) and unmodified controls (Mock) are shown (A & C). Corresponding first-derivatives  
547 of processed melt curves are shown in B and D. Replicates G1 and G2, A1 and A2 refer to  
548 gDNA samples amplified using primers that produce 107 bp amplicon, whereas G5 and  
549 G6, and A5 and A6 refer to gDNA samples amplified using primers that produce 140 bp  
550 amplicon. The derivative melt curves were decomposed using the 3-GD model to estimate  
551 the mutant frequency. The estimated mutant frequencies for both sizes of amplicons are  
552 shown in (E). Error bar = 1 SD.

553

554 **Table 3** Parameters determined by 3-GD of two different size amplicons from the CCR5-  
555 edited target site

| <b>Gaussian<br/>Parameters</b> | <b>107 bp PCR product</b> | <b>140 bp PCR product</b> |
|--------------------------------|---------------------------|---------------------------|
| $W_1$ (%)                      | $29.8 \pm 1.1$            | $28.9 \pm 8.6$            |
| $\mu_1$                        | $79.8 \pm 0.23$           | $82.1 \pm 0.19$           |
| $\sigma_1$                     | $1.88 \pm 0.20$           | $1.07 \pm 0.26$           |
| $w_2$                          | $0.49 \pm 0.01$           | $0.48 \pm 0.06$           |
| $\mu_2$                        | 82.8                      | 84.2                      |
| $\sigma_2$                     | $0.57 \pm 0.01$           | $0.51 \pm 0.01$           |
| $w_3$                          | $0.21 \pm 0.00$           | $0.24 \pm 0.03$           |
| $\mu_3$                        | 82.1                      | 83.6                      |
| $\sigma_3$                     | $0.77 \pm 0.05$           | $0.65 \pm 0.12$           |

556

557

## 558 **Discussion**

559 Here we outline a method for estimating the efficiency of genome-editing reagents by GD  
560 of high-resolution melt curve data. An initial pre-processing of the raw melt curve data was  
561 required to correct for the quenching effect of temperature on measurement of  
562 fluorescence as a prelude to GD for estimating the genome-editing efficiency. Our  
563 approach consisted of two separate steps for correcting melting curves for temperature-  
564 dependent quenching of fluorophore. The initial step of cleaning the data involved

565 removing the background fluorescence emanating from the free or unbound fluorophore.  
566 Two methods have been used for this purpose. The first is to use an arbitrary cutoff point  
567 in the post-melt region of the raw melt curve and subtract this value from all upstream  
568 RFUs. We found that this method sometimes resulted in a small but narrow tail in the post-  
569 melt region of the curve before it hit the baseline. This discrepancy could affect curve  
570 fitting of the first derivative of the processed melt curve. The tail also hinted at a  
571 temperature-dependent quenching of the free fluorophore. We confirmed this quenching  
572 from linear regression analysis of no template controls used in PCR across the entire  
573 range of melting (Fig. 1). The computed background RFU from linear regression of the  
574 post-melt region of individual melt curves was used to effectively subtract the effect of free  
575 fluorophore on the melt curve.

576 The second step to processing the melt curve involved correcting for temperature-  
577 dependent quenching of the dsDNA-bound fluorophore evidenced in the pre-melt region.  
578 As for the post-melt region, regression analysis of the pre-melt region can be used to  
579 determine the efficiency of fluorescence of the dsDNA-bound fluorophore at any  
580 temperature point along the melt curve profile. While detection efficiency can be computed  
581 for individual melt curve profiles, we found that the temperature range of the pre-melt  
582 region could be much shorter for some genome-edited samples due to the expected lower  
583 T<sub>m</sub>s for deletion mutations. For example, the pre-melt regions were only nominally present  
584 for drug-selected samples that had a very high proportion of mutant molecules in the  
585 amplicon (Fig. 5). In this case the mutant population constituted more than 90% of the  
586 PCR product.

587 We found that for a given target, and pair of primers, the efficiency of detection of dsDNA-  
588 bound fluorophore could be computed accurately and solely from unmodified or mock-  
589 transfected samples. These efficiencies could not be distinguished from those estimated  
590 from the individual test samples where sufficient pre-melt region was present (Fig. 1D).

591 We therefore chose to determine bound fluorophore detection efficiency from replicates of  
592 mock-transfected samples and averaging them. Correction for the quenching of  
593 fluorescence of dsDNA-bound fluorophore could be simply achieved by dividing the  
594  $BcRFU(x)$  by the detection efficiency,  $E(x)$  (Materials and Methods, Equation 4). This  
595 process effectively eliminated the downward slope of the pre-melt region (Fig. 1C).

596 The temperature-dependent decay of fluorescence of dsDNA-bound fluorophore could be  
597 modeled using either a first- or second-order polynomial function. For CCR5 samples, the  
598 pre-melt region, following a correction using a first-order polynomial, showed a gentle  
599 upward trajectory (saddleback pre-melt region) indicating that the RFU was not  
600 compensated appropriately. Estimating the dsDNA-bound fluorophore efficiency using a  
601 second-order polynomial curve fitting of the pre-melt region eliminated this artifact. From  
602 this one can surmise that the fluorescence decay of dsDNA-bound fluorophore at higher  
603 temperatures is better modeled with a second-order polynomial.

604 Correction for temperature-dependent quenching of fluorophores has been described  
605 previously. Watras et al., found that fluorescence of chromophoric dissolved organic  
606 matter (CDOM) decreased as ambient water temperature increased [20]. They suggested  
607 compensating for the quenching using the equation:

$$608 \quad CDOM_r = \frac{CDOM_m}{[1 + \rho(T_m - T_r)]} \quad (13)$$

609 where  $t$  = temperature ( $^{\circ}\text{C}$ ),  $r$  = reference and  $m$  = measured values, the coefficient,  $\rho$ , is  
610 the quotient of slope divided by the intercept. The actual coefficient value,  $\rho$ , was found to  
611 be instrument-dependent. A similar approach was recommended by Ryder et al [21,22].

$$612 \quad CDOM_{ref} = (CDOM_{meas} \times [1 + f_t(T_{ref} - T_{meas})]) \quad (14)$$

613 where  $f_t$  is the temperature correction coefficient,  $ref$  and  $meas$  refer to reference and  
614 measured temperatures. The two formulae for calculating fluorescence compensation

615 were shown to be mathematically identical [23]. This correction method is comparable to  
616 our approach. Our initial attempts at correction for the quenching effect was to determine  
617 the slope of pre-melt region and use it in place of the coefficient,  $\rho$ , in Equation 13. This  
618 was combined with a simple baseline cut off for correction of melt curve data. We,  
619 however, prefer first-order polynomial curve fit to determine and subtract the background  
620 from individual melting curves, and then correct for the quenching effect of temperature on  
621 dsDNA-bound fluorophore by dividing with the efficiency of detection of dsDNA determined  
622 from unmodified controls. Both approaches should provide comparable results for  
623 subsequent curve fitting after numerical differentiation. Our approach eliminates the  
624 requirement for slope determination of the pre-melt region for each of the test samples  
625 easing computation.

626 Palais and Wittwer described two methods for background correction [24]. 1) A baseline  
627 method:

$$628 \quad M(T) = \frac{F(T) - L_0(T)}{L_1(T) - L_0(T)} \quad (15)$$

629 where,  $M(T)$  is the corrected melt curve,  $F(T)$  is the experimentally obtained melt curve,  
630 and  $L_1(T)$  and  $L_0(T)$  refer to linear equations describing pre-melt and post-melt regions of  
631 the curve, respectively. Thus,  $M(T)$  corresponds to  $F_cRFU(x)$ ,  $F(T)$  to  $RFU(x)$ ,  $L_1(T)$  to  
632  $F_{pre}(x)$  and  $L_0(T)$  to  $B_{pom}(x)$  of this study.

633 2) They also described an exponential background subtraction model:

$$634 \quad F(T) = M(T) + B(T) \quad (16)$$

$$\text{Where the background, } B(T) = Ce^{a(T-T_L)}$$

$C$  and  $a$  are determined as described in detail in their publication.

635 The exponential background correction is recommended by Palais and Wittwer for  
636 experiments involving multiple small amplicons and unlabeled probes, and also where the

637 pre- or post-melt regions of melt curve exhibit a concavity. We evaluated the exponential  
638 background subtraction method to process the raw melting curve data for amplicons of F8-  
639 S2 and CCR5 loci in unedited mock samples. The results are shown in Figs. 7A and 7B  
640 and indicate that this correction method only partially compensated for the quenching  
641 observed in the pre-melt region. Since the mutant population encroaches on pre-melt  
642 region and extends into the melt transition portion, we abandoned this approach for  
643 preprocessing the high-resolution melt curves.

644

645 **Fig. 7** Comparison of different methods of processing melt curve data for background and  
646 fluorescence quenching correction. Melt curve data from amplicons of unmodified or  
647 control samples from F8-S2 (A) or CCR5 target loci (B) were either unprocessed ( $-dF/dT$ ,  
648 blue trace) or corrected using exponential background subtraction method of Palais and  
649 Wittwer (24) ( $-dF/dT-dB/dT$ , red dashes) or the method described in this study ( $-$   
650  $d(nF_cRFU)/dT$ , green trace).

651

652 Our method for preprocessing melt curve data is mathematically indistinguishable from the  
653 simpler baseline model of Palais and Wittwer (Equation 15). One difference between the  
654 Palais and Wittwer method and our method is that we first subtract background emanating  
655 from unbound fluorophore before correcting for efficiency of detection of dsDNA-bound  
656 fluorophore. The second difference is that we formulate the decrease in fluorescence of  
657 the pre-melt region not as a background problem but rather as an issue of detection  
658 efficiency. The third difference is that the quenching of dsDNA-bound fluorophore was  
659 modeled using either a first- or a second-order polynomial function depending on the  
660 particular target amplicon. The final difference is that we determined ds-DNA bound



661 fluorophore detection efficiencies from control or mock samples and applied those to  
662 correct melt curves of genome-edited samples.

663 After preprocessing melt curve data, we used GD to successfully model first derivative  
664 melt curves. Cuellar and coworkers were amongst the earliest investigators to analyze  
665 high-resolution denaturation profiles of reassociated repetitive DNA sequences using a  
666 combination of higher derivative analysis and curve fitting [25]. They were able to  
667 distinguish "thermal classes" of repetitive DNA duplexes exhibiting different amounts of  
668 base pair mismatch in reassociated DNA. Reassociated *Escherichia coli* DNA exhibited a  
669 single thermal class while pea and mung bean re-associated DNAs showed five distinct  
670 thermal classes. These investigators obtained the first to fifth derivatives of the melting  
671 profiles by numerical differentiation followed by smoothing using nine-point running  
672 averages. For curve fitting of first derivative curves they used a software program called  
673 RESOLV. Their results showed that the number of peaks identified by RESOLV  
674 corresponded well with the fifth derivative of the melting profiles of reassociated mung  
675 bean or pea DNAs. While these investigators were able to use an empirical approach to  
676 identify multiple Gaussian components in reassociated DNA of legumes, they were unsure  
677 if the components corresponded to populations of distinct sequences.

678 Moore and Gray proposed a method dubbed derivative domain fitting for resolving a  
679 mixture of normal distributions in the presence of a contaminating background [26]. They  
680 proposed this model for analyzing flow cytometric data. A requirement for decomposition  
681 was that Gaussian peaks had to be separated by an SD greater than two. They mentioned  
682 difficulties in accurately modeling the background by their method. While their approach is  
683 an example of GD of data, their study is not directly comparable to ours.

684 Nellåker and coworkers proposed a *mixture model* to analyze of melting temperature data  
685 [27]. The premise of their model is that distinct  $T_m$  categories indicate presence of

686 population of unique sequences. The "mixture model" allows calculating the proportions of  
687 amplicons contributing to the distinct T<sub>m</sub> categories identified in the mixes. Nellåker and  
688 coworkers state that their *mixture model* actually denotes *mixture distributions* of statistical  
689 distributions that arise from sampling of mixed populations. They formulate the probability  
690 density function,  $g(x)$  as follows:

$$691 \quad g(x) = \pi_1 f_1(x) + \dots + \pi_k f_k(x) \text{ where } 0 \leq \pi_i \leq 1, i = 1 \dots k, \pi_1 + \dots + \pi_k = 1 \quad (17)$$

692 The parameters  $\pi_1 \dots \pi_k$  are referred to as the mixing weights or proportions. They applied  
693 the mixture models to T<sub>m</sub> data assuming it to consist of normally distributed components  
694 with each component having the same standard deviation. They used a Gaussian  
695 distribution function for their model. Thus, the function  $g(x)$  (Equation 17) was represented  
696 as:

$$697 \quad g(x) = \sum_{i=1}^k \pi_i \frac{1}{\sigma\sqrt{2\pi}} e^{-\frac{(x-\mu_i)^2}{2\sigma^2}} \quad (18)$$

where,  $x$  refers to temperature, and  $\mu_i$  refers to  
T<sub>m</sub> of individual components of the mixture

698 The sum of Gaussian functions that we used in this study (Materials and Methods,  
699 Equations 9 and 10) to curve fit the first derivative of processed melt curves, is similar to  
700 that of Nellåker and coworkers. However, Nellåker and coworkers used their Gaussian  
701 function for modeling T<sub>m</sub> distributions of individual components of their mixture and did not  
702 apply it to derivative transformations of melt curves of mocks. Here, we *apply the sum of*  
703 *Gaussian functions to empirically reproduce the shape of the first derivative of high-*  
704 *resolution melt curves for both mocks (sum of two Gaussians) and genome-edited*  
705 *samples (sum of three Gaussians). A second difference is that we did not assume the SD*  
706 *was the same for the decomposed Gaussian components. They were designated as*  
707 *separate parameters for each Gaussian and set free during the modeling. However both*

708 Gaussian models sought to measure the proportion of particular component of the mixes,  
709 the only difference being, we designated the weight of the different components as  $w_{1-3}$   
710 instead of  $\pi_i$ . This also eliminated possible confusion between the weight coefficient and  
711 the mathematical constant  $\pi$ . In our case too, the sum of the weights of the Gaussian  
712 components of first derivative melt curves equaled one.

713 Mann et al., also used a Gaussian model to curve fit melt curve derivatives [28]. They  
714 were interested in automating the screening of first derivative melt curves following PCR to  
715 detect products with unusual or aberrant melt curves to rapidly eliminate those samples  
716 from further analyses. They used a different background correction method than those  
717 described above. Their approach provides a pure Gaussian after subtraction of a sigmoid  
718 shaped background fluorescence that does not retain the granularity of the derivative melt  
719 curve from genome-edited target sites. In our model, the shape of the derivative melt  
720 curve is critical for the precise quantitative decomposition into its Gaussian components.

721 There was good correspondence between the results obtained by GD and our earlier  
722 described method based on DCAs for estimating mutant amplicon frequency (Fig. 5). The  
723 DCA method was previously validated from NGS of the same amplicons. While the GD  
724 and DCA methods yielded comparable estimation of editing efficiencies, there were a few  
725 exceptions for amplicons consisting almost entirely of mutant species (Fig. 5A vs. 5B,  
726 pDonor/Selected samples). We know, from our earlier study using a TaqMan assay, that  
727 these gDNA samples have no detectable wildtype amplicons. Our explanation for this  
728 anomaly is that 3-GD of nearly pure mutant amplicons (Equation 12) generates Gaussians  
729 that overlap with those of mocks (Fig. 5A). In support of this hypothesis is our earlier  
730 finding that indels with sufficiently large insertions can mimic wildtype molecules in HRMA  
731 and constitute less than 10%. It is rather unlikely for mutant frequencies to approach such  
732 high levels in transient transfection experiments in the absence of drug selection. We

733 therefore believe that this would not pose a significant hurdle for the GD model for  
734 estimation of editing efficiencies.

735 During GD of mocks, we were intrigued by the small discrepancy in the derivative melt  
736 curves at the melt transition temperature seen in single-Gaussian modeling. This seemed  
737 more pronounced in F8-S2 samples. We hypothesized that in F8-S2 amplicons, there  
738 were regions of the sequence that melted sooner or behaved as a nearly independent  
739 domain that was AT-rich. To identify these regions in the sequence, we wrote a Python  
740 function that determined the percentage of As and Ts in sliding windows of 10-mers that  
741 shifted by one nucleotide. The moving averages (period = 5) are shown in Fig. 8A and 8B  
742 (green traces). In the F8-S2 sequence, two initial broad regions with high AT content were  
743 visible (Fig. 8A). In contrast, in the CCR5 sequence, few AT-rich regions that seemed  
744 narrower were seen (Fig. 8 B).

745

746 **Fig. 8** Analysis of F8-S2 and CCR5 target sequence features and melting properties *in*  
747 *silico*. Sliding window analysis of percentage of AT (%AT) in F8-S2 (A) or CCR5 (B)  
748 sequences of target sites amplified by PCR. The percentage of As and Ts were  
749 determined in a sliding overlapping window of 10-mers. The shift was by 1 bp. These are  
750 shown as green dashes. The data was smoothed using running averages with a period of  
751 5 (solid green line). The sum of free energies ( $\Delta G_s$ ) in a sliding window of 10-mers and a  
752 shift of 1 bp is shown along the left y-axis in kJ/mol (blue dots). The running averages  
753 were calculated as for %AT traces and are shown as blue traces. Putative AT-rich  
754 domains are marked I-IV. (C- H) The F8-S2 and CCR5 target sequences were used as  
755 input in the UMelt web analysis tool (29). UMelt predicted derivative melt curve (C and D),  
756 "Dynamic Profile" of melting (E and F) using a sliding temperature control that was situated  
757 close to the predicted  $T_m$  for each sequence to identify portions of the target sequences

758 (nucleotide position indicated on the x-axis) that may have melted earlier than the rest.

759 The web tool also provided a "Melting Profile" analysis that shows potential regions that

760 might show greater tendency to melt earlier (G and H).

761

762 We wrote another Python function to compute the free energy of a 10-mer sequence

763 window by using the nearest-neighbor method. For this analysis too, we used a sliding

764 window that shifted by one nucleotide. The moving averages (period =2) are shown in Fig.

765 8 (blue traces). Again, the initial AT-rich region exhibited lower free energies ( $\Delta G$ s) for F8-

766 S2 sequence than that of the CCR5 sequence (Fig. 8A and 8B).

767 We next used the online web tool uMelt [29] to determine if the melting profiles of F8-S2

768 and CCR5 amplicon sequences could be distinguished by *in silico* analysis. For F8-S2

769 amplicon, the derivative melt curve predicted by uMelt web tool, showed a bulge in the

770 early melt region (Fig. 8C). The Dynamic Profile window also predicted melting at earlier

771 temperatures at both ends, particularly at the 5' end of the sequence (Fig. 8D). The

772 Melting Profile pane (Fig. 8E) also showed increased melting at lower temperatures for the

773 first 50 base pairs. In contrast to F8-S2, for the CCR5 target sequence amplicon, the web

774 tool predicted only a small deviation of melt curve in the early melt region (Fig. 8F). The

775 Dynamic Profile (Fig. 8G) for CCR5 target amplicon also showed nearly equal rates of

776 melting from both ends of the sequence with a barely visible enhancement for the left end.

777 Likewise, the Melting Profile pane (Fig. 8H) showed very little propensity for a separate

778 domain that exhibited different melting characteristics than the rest of the sequence for

779 CCR5. The differences noted between the predicted derivative melt curves and the

780 experimentally derived counterparts have been attributed to uMelt software being based

781 on  $\Delta G$ s determined for pairs of nucleotides using a spectrophotometric method rather than

782 on fluorescence emission from the binding of dsDNA-binding fluorophores. Nevertheless,

783 uMelt analysis supports the two-Gaussian model for curve fitting of unmodified control  
784 samples.

785 In conclusion, this paper describes a method to correct high-resolution melt curves for  
786 temperature-dependent quenching of free and dsDNA-bound fluorophore. This is the first  
787 report, to the best of our knowledge, to demonstrate that first derivative melting curves of  
788 properly processed high-resolution melt curve data can be precisely modeled as a sum or  
789 superposition of Gaussian functions. The GD model successfully estimated efficiency of  
790 genome-editing by engineered sequence-directed endonucleases without a requirement  
791 for standard curves and has the additional advantage of being a single-tube method.

## 792 **Acknowledgments**

793 We thank the Division of Hematology-Oncology, Bone Marrow Transplant and Cellular  
794 Therapy within the Department of Internal Medicine, Saint Louis University, for making  
795 available facilities and funding to carry out the described work. We also thank Mike  
796 Marcinkowski for editing the text and Matt Schuelke for reviewing the statistics used in  
797 evaluating GD models.

## 798 **Supporting information**

799 Datasets containing Excel, Numbers (generated on Mac) and Jupyter Notebook files (for  
800 running Python programs used in the manuscript) can be accessed at:  
801 <https://figshare.com/s/4f07b851af468f18b42d>

## 802 **Bibliography**

- 803 1. Ran FA, Hsu PD, Wright J, Agarwala V, Scott DA, Zhang F. Genome engineering  
804 using the CRISPR-Cas9 system. *Nature Protocols*. 2013;8: 2281–2308.  
805 doi:10.1038/nprot.2013.143
- 806 2. Sakuma T, Yamamoto T. CRISPR/Cas9: The Leading Edge of Genome Editing  
807 Technology. *Targeted Genome Editing Using Site-Specific Nucleases*. Tokyo:

- 808 Springer Japan; 2014. pp. 25–41. doi:10.1007/978-4-431-55227-7\_2
- 809 3. Kiani S, Chavez A, Tuttle M, Hall RN, Chari R. Cas9 gRNA engineering for genome  
810 editing, activation and repression. *Nature*. 2015.
- 811 4. Glazkova DV, Shipulin GA. TALE nucleases as a new tool for genome editing. *Mol*  
812 *Biol*. Pleiades Publishing; 2014;48: 305–318. doi:10.1134/S0026893314030054
- 813 5. Boch J. TALEs of genome targeting. *Nature Biotechnology*. *Nature Research*;  
814 2011;29: 135–136. doi:10.1038/nbt.1767
- 815 6. Mussolino C, Cathomen T. TALE nucleases: tailored genome engineering made  
816 easy. *Curr Opin Biotechnol*. 2012;23: 644–650. doi:10.1016/j.copbio.2012.01.013
- 817 7. Wyman C, Kanaar R. DNA Double-Strand Break Repair: All's Well that Ends Well.  
818 *Annu Rev Genet*. 2006;40: 363–383. doi:10.1146/annurev.genet.40.110405.090451
- 819 8. Jacquet K, Côté J. DNA repair. *Cell Cycle*. Taylor & Francis; 2014;13: 1059–1059.  
820 doi:10.4161/cc.28383
- 821 9. Symington LS, Gautier J. Double-Strand Break End Resection and Repair Pathway  
822 Choice. *Annu Rev Genet*. 2011;45: 247–271. doi:10.1146/annurev-genet-110410-  
823 132435
- 824 10. Zhu L, Mon H, Xu J, Lee JM, Kusakabe T. CRISPR/Cas9-mediated knockout of  
825 factors in non-homologous end joining pathway enhances gene targeting in silkworm  
826 cells. *Nature Publishing Group*. *Nature Publishing Group*; 2015;5: 1–13.  
827 doi:10.1038/srep18103
- 828 11. Lin S, Staahl BT, Alla RK, Doudna JA. Enhanced homology-directed human genome  
829 engineering by controlled timing of CRISPR/Cas9 delivery. *eLife*. 2014;3: 1314–13.  
830 doi:10.7554/eLife.04766
- 831 12. Zaboikin M, Zaboikina T, Freter C, Srinivasakumar N. Non-Homologous End Joining  
832 and Homology Directed DNA Repair Frequency of Double-Stranded Breaks  
833 Introduced by Genome Editing Reagents. Hu W, editor. *PLoS ONE*. Public Library of  
834 Science; 2017;12: e0169931. doi:10.1371/journal.pone.0169931
- 835 13. Miyaoka Y, Berman JR, Cooper SB, Mayerl SJ, Chan AH, Bin Zhang, et al.  
836 Systematic quantification of HDR and NHEJ reveals effects of locus, nuclease, and  
837 cell type on genome- editing. *Nature Publishing Group*. *Nature Publishing Group*;  
838 2016;6: 1–12. doi:10.1038/srep23549
- 839 14. Parant JM, George SA, Pryor R, Wittwer CT, Yost HJ. A rapid and efficient method  
840 of genotyping zebrafish mutants. *Dev Dyn*. Wiley-Liss, Inc; 2009;238: 3168–3174.  
841 doi:10.1002/dvdy.22143
- 842 15. Thomas HR, Percival SM, Yoder BK, Parant JM. High-throughput genome editing  
843 and phenotyping facilitated by high resolution melting curve analysis. Jennings B,  
844 editor. *PLoS ONE*. 2014;9: e114632. doi:10.1371/journal.pone.0114632
- 845 16. Hill JT, Demarest BL, Bisgrove BW, Su Y-C, Smith M, Yost HJ. Poly peak parser:  
846 Method and software for identification of unknown indels using sanger sequencing of  
847 polymerase chain reaction products. *Dev Dyn*. 2014;243: 1632–1636.



- 848           doi:10.1002/dvdy.24183
- 849   17.   Srinivasakumar N, Zaboikin M, Tidball AM, Aboud AA, Neely MD, Ess KC, et al.  
850        Gammaretroviral vector encoding a fluorescent marker to facilitate detection of  
851        reprogrammed human fibroblasts during iPSC generation. *PeerJ*. PeerJ Inc; 2013;1:  
852        e224. doi:10.7717/peerj.224
- 853   18.   Srinivasakumar N. Packaging cell system for lentivirus vectors. Preparation and use.  
854        *Methods Mol Med*. 2002;69: 275–302.
- 855   19.   Forbes C, Evans M, Hastings N, Peacock B. *Statistical Distributions*. Hoboken, NJ,  
856        USA: John Wiley & Sons, Inc; 2010. doi:10.1002/9780470627242
- 857   20.   Watras CJ, Hanson, P.C., Stacy TL, Morrison KM, Mather J, Hu YH, et al. A  
858        temperature compensation method for CDOM fluorescence sensors in freshwater.  
859        *Limnology and Oceanography: Methods*. 2011;9: 296–301.  
860        doi:10.4319/lom.2011.9.296
- 861   21.   Ryder E, Jennings E, de Eyto E, Dillane M, NicAonghusa C, Pierson DC, et al.  
862        Temperature quenching of CDOM fluorescence sensors: temporal and spatial  
863        variability in the temperature response and a recommended temperature correction  
864        equation. *Limnology and Oceanography: Methods*. 2012;10: 1004–1010.  
865        doi:10.4319/lom.2012.10.1004
- 866   22.   Ryder E, Jennings E, de Eyto E, Dillane M, Nic Aonghusa C, Pierson DC, et al.  
867        Reply to a comment by Watras et al. (2014) on temperature compensation method  
868        for field measurements of CDOM fluorescence. *Limnology and Oceanography:*  
869        *Methods*. 2015;13: 527–528. doi:10.1002/lom3.10045
- 870   23.   Watras CJ, Morrison KA, Mather J, Milewski P, Hanson PC. Correcting CDOM  
871        fluorescence measurements for temperature effects under field conditions in  
872        freshwaters. *Limnology and Oceanography: Methods*. 2014;12: 23–24.  
873        doi:10.4319/lom.2014.12.23
- 874   24.   Palais R, Wittwer CT. Chapter 13 - Mathematical Algorithms for High-Resolution  
875        DNA Melting Analysis. 1st ed. *Methods in Enzymology: Computer Methods, Part A*.  
876        Elsevier Inc; 2009. pp. 323–343. doi:10.1016/S0076-6879(08)03813-5
- 877   25.   Cuellar RE, Ford GA, Briggs WR, Thompson WF. Application of higher derivative  
878        techniques to analysis of high-resolution thermal denaturation profiles of  
879        reassociated repetitive DNA. *Proceedings of the National Academy of Sciences*.  
880        National Academy of Sciences; 1978;75: 6026–6030.
- 881   26.   Moore DH, Gray JW. Derivative domain fitting: a new method for resolving a mixture  
882        of normal distributions in the presence of a contaminating background. *Cytometry*.  
883        1993;14: 510–518. doi:10.1002/cyto.990140510
- 884   27.   Nellåker C, Uhrzander F, Tyrcha J, Karlsson H. Mixture models for analysis of  
885        melting temperature data. *BMC Bioinformatics*. 2008;9: 370–6. doi:10.1186/1471-  
886        2105-9-370
- 887   28.   Mann TP, Humbert R, Stamatoyannopolous JA, Noble WS. Automated validation of  
888        polymerase chain reactions using amplicon melting curves. *Proc IEEE Comput Syst*  
889        *Bioinform Conf*. 2005;: 377–385.



- 890 29. Dwight Z, Palais R, Wittwer CT. uMELT: prediction of high-resolution melting curves  
891 and dynamic melting profiles of PCR products in a rich web application.  
892 Bioinformatics. Oxford University Press; 2011;27: 1019–1020.  
893 doi:10.1093/bioinformatics/btr065

894

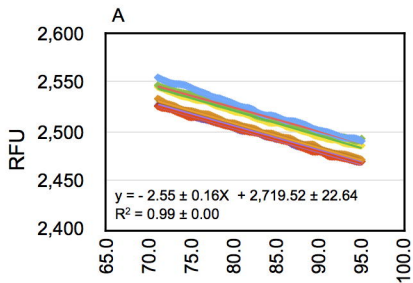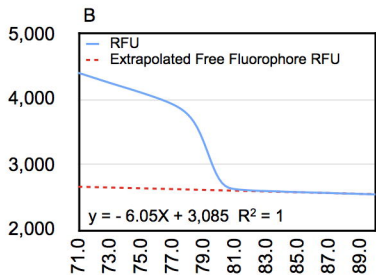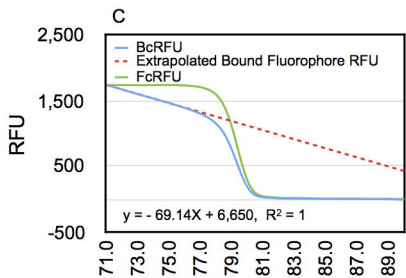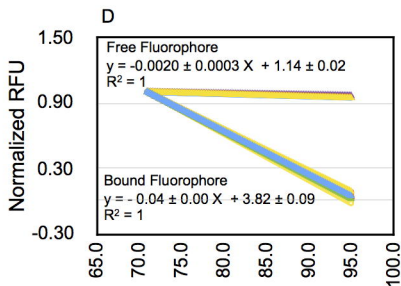

Temperature

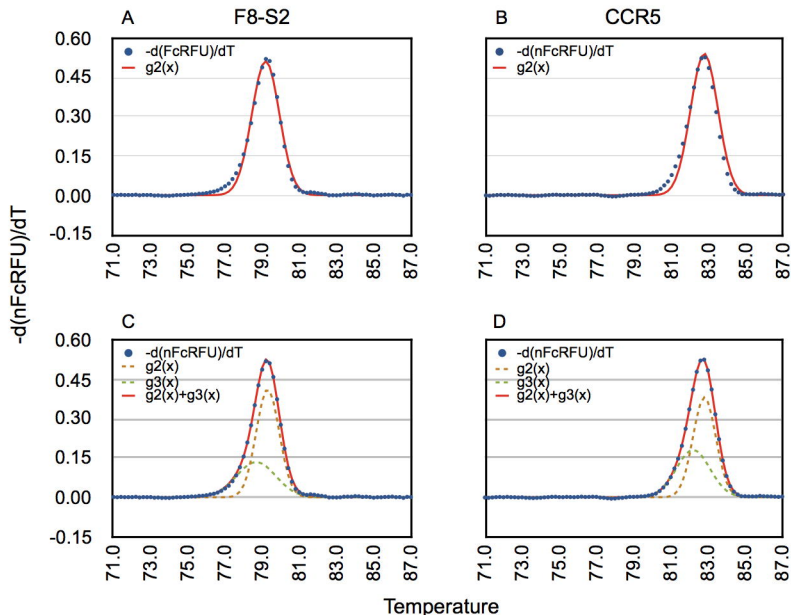

Table E. 1-GD parameters of derivative melt curves of controls

| Gaussian Function | Parameters                                             | F8-S2             | CCR5               | Curve Fitting Comments |
|-------------------|--------------------------------------------------------|-------------------|--------------------|------------------------|
| g2(x)             | g2 weight ( $w_2$ )<br>(area under the curve)          | $0.954 \pm 0.002$ | $1.003 \pm 0.004$  | Set free               |
|                   | g2 center ( $\mu_2$ )<br>( $T_m$ )                     | $79.19 \pm 0.002$ | $82.753 \pm 0.087$ | Set free               |
|                   | g2 SD ( $\sigma_2$ )<br>(width at half-maximal height) | $0.738 \pm 0.003$ | $0.740 \pm 0.008$  | Set free               |

Table F. 2-GD parameters of derivative melt curves of controls

| Gaussian Function | Parameters            | F8-S2              | CCR5               | Curve Fitting Comments |
|-------------------|-----------------------|--------------------|--------------------|------------------------|
| g2(x)             | g2 weight ( $w_2$ )   | $0.647 \pm 0.006$  | $0.587 \pm 0.009$  | Set free               |
|                   | g2 center ( $\mu_2$ ) | $79.31 \pm 0.017$  | $82.898 \pm 0.088$ | Set free               |
|                   | g2 SD ( $\sigma_2$ )  | $0.610 \pm 0.011$  | $0.618 \pm 0.003$  | Set free               |
| g3(x)             | g3 center ( $\mu_3$ ) | $78.642 \pm 0.013$ | $82.265 \pm 0.069$ | Set free               |
|                   | g3 SD ( $\sigma_3$ )  | $1.013 \pm 0.048$  | $0.907 \pm 0.019$  | Set free               |
|                   | g3 weight ( $w_3$ )   | $1 - w_2$          | $1 - w_2$          | Set $w_3 = 1 - w_2$    |

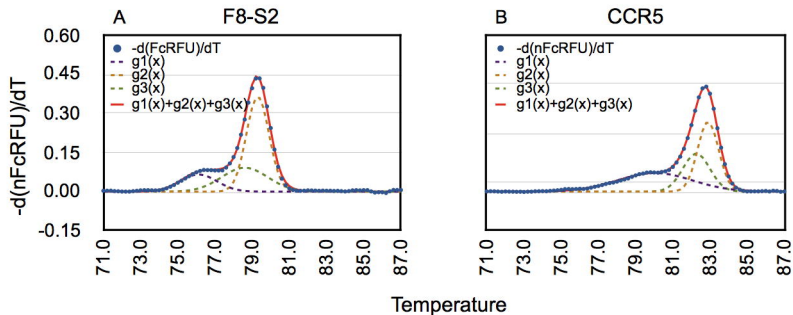

Table C. 3-GD parameters of derivative melt curves of genome-edited samples

| Gaussian Function | Parameters                          | F8-S2 clone 10     | CCR5 L1R1          | Curve Fitting Comments          |
|-------------------|-------------------------------------|--------------------|--------------------|---------------------------------|
| g1(x)             | g1 weight ( $w_1$ )                 | $0.186 \pm 0.032$  | $0.232 \pm 0.087$  | Set free                        |
|                   | g1 center ( $\mu_1$ )               | $76.228 \pm 0.112$ | $79.680 \pm 0.307$ | Set free                        |
|                   | g1 SD ( $\sigma_1$ )                | $0.991 \pm 0.004$  | $1.392 \pm 0.423$  | Set free                        |
| g2(x)             | g2 weight ( $w_{2\text{fixed}}$ )   | 0.6607             | 0.5870             | Average $w_2$ from mock         |
|                   | g2 center ( $\mu_{2\text{fixed}}$ ) | 79.300             | 82.900             | Average $\mu_2$ from mock       |
|                   | g2 SD ( $\sigma_2$ )                | $0.602 \pm 0.010$  | $0.574 \pm 0.011$  | Set free                        |
| g3(x)             | g3 weight ( $w_{3\text{fixed}}$ )   | $1 - w_2$          | $1 - w_2$          | Average from mock ( $1 - w_2$ ) |
|                   | g3 center ( $\mu_{3\text{fixed}}$ ) | 78.600             | 82.270             | Average $\mu_3$ from mock       |
|                   | g3 SD ( $\sigma_3$ )                | $1.040 \pm 0.186$  | $0.899 \pm 0.158$  | Set free                        |

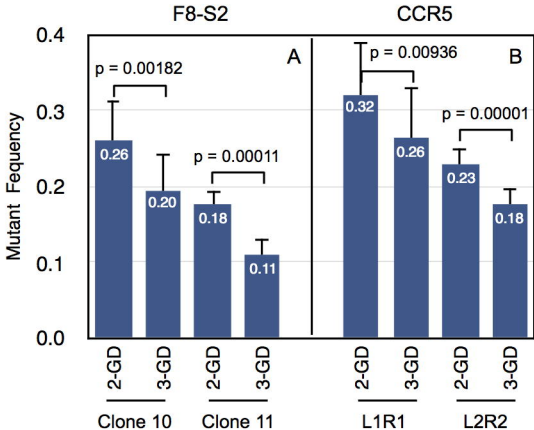

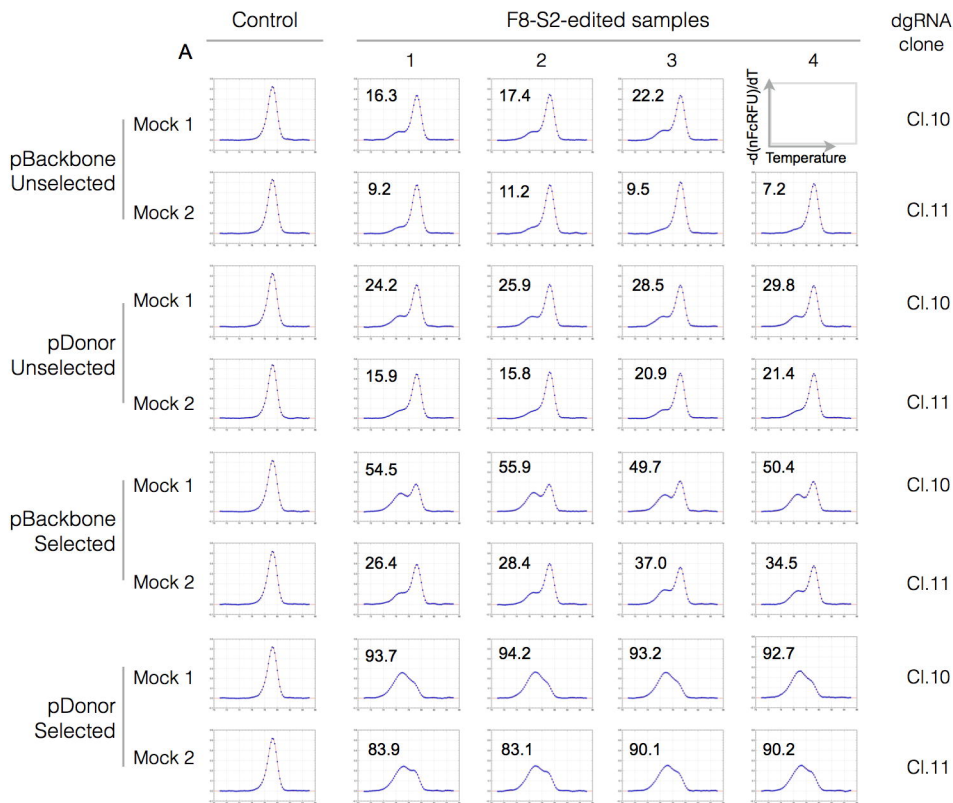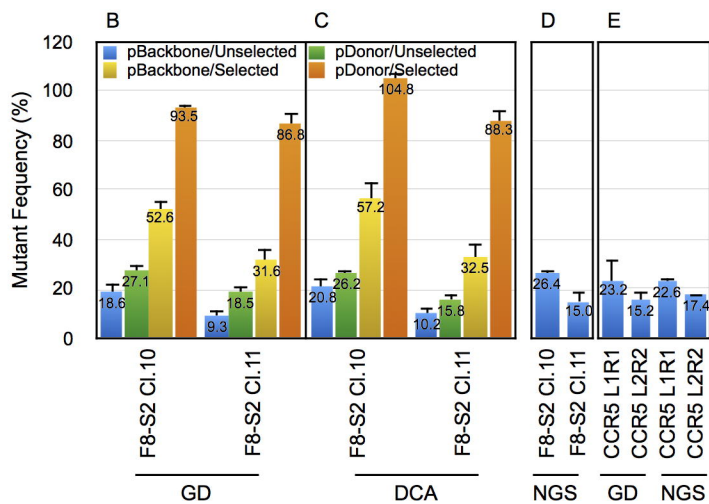

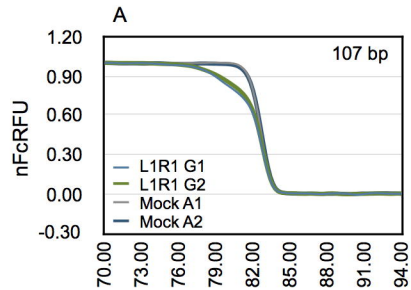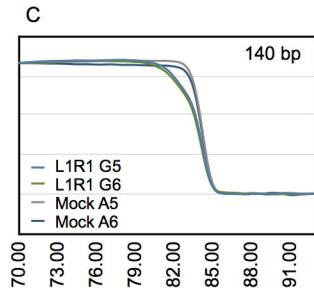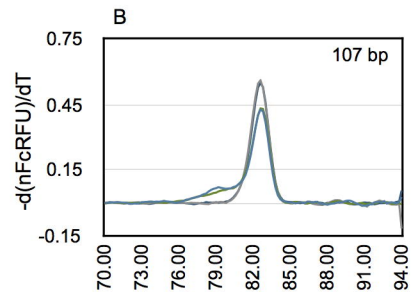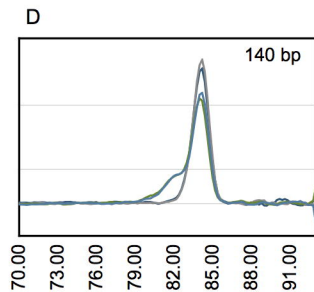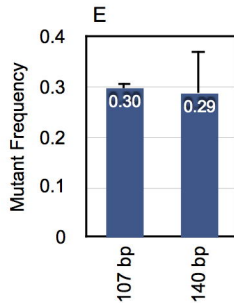

Temperature

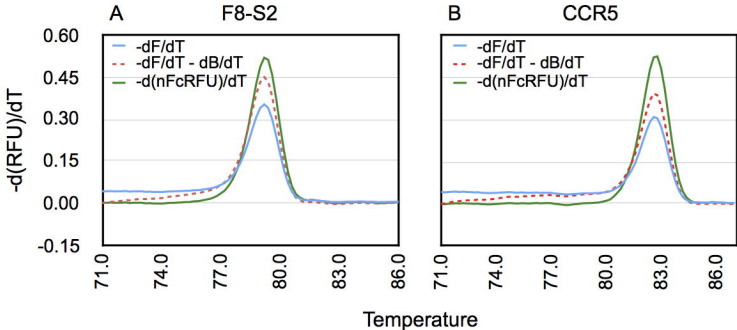



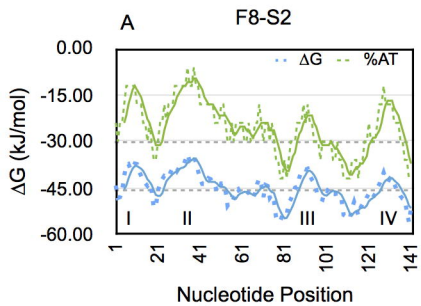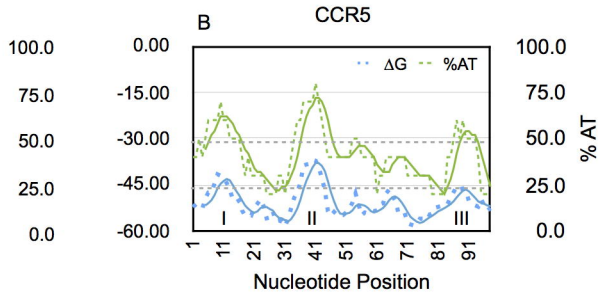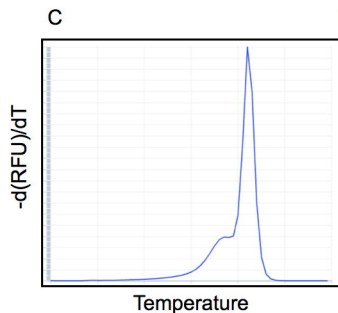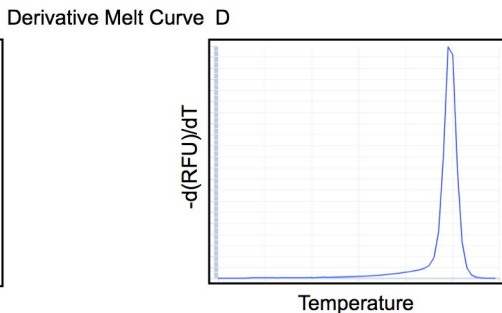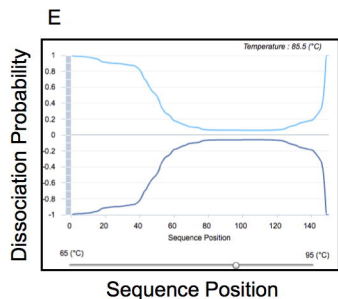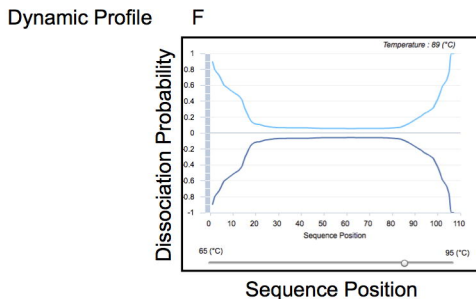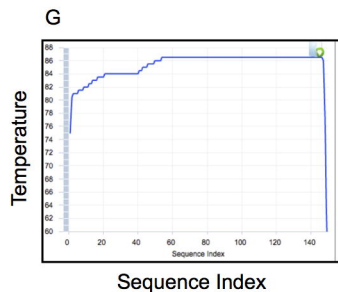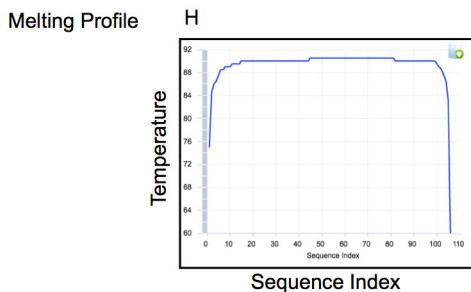

Source: https://www.biorxiv.org/content/10.1101/176719v3.full.pdf
